# Supplementary material for: Hydroxytyrosol ameliorates stress-induced liver injury through activating autophagy via HDAC1/2 inhibition
Source: Royal Society of Chemistry journal article supplement (doi:10.1039/d4fo01027b), 2024-01-01

### HDAC1

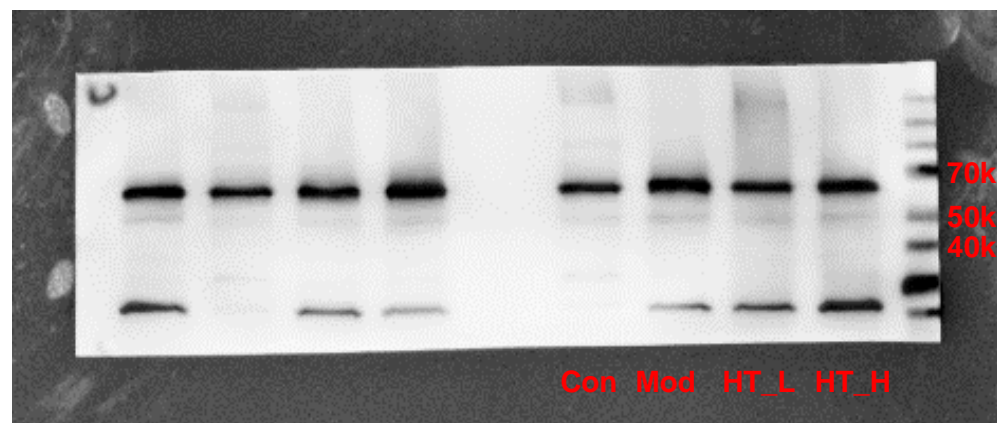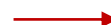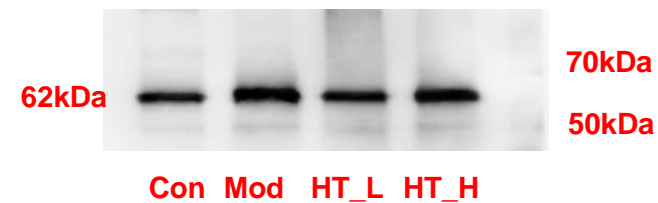

### $\beta$ -actin

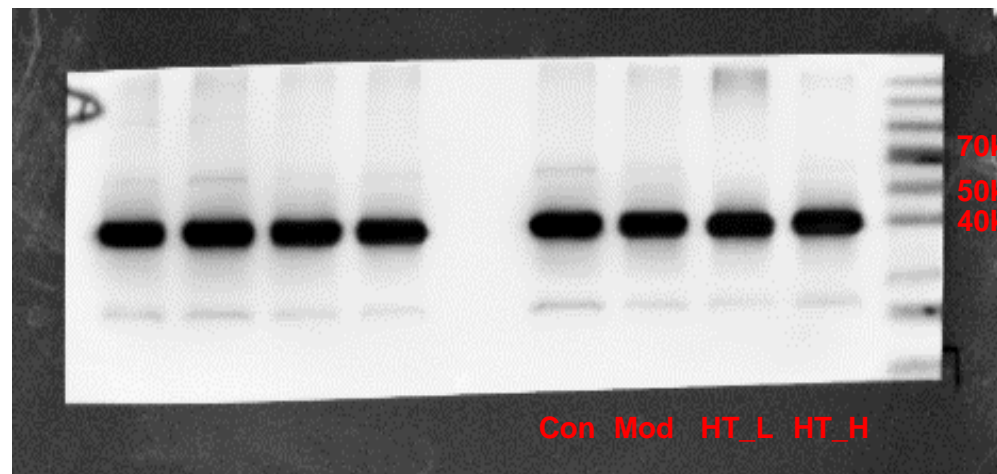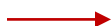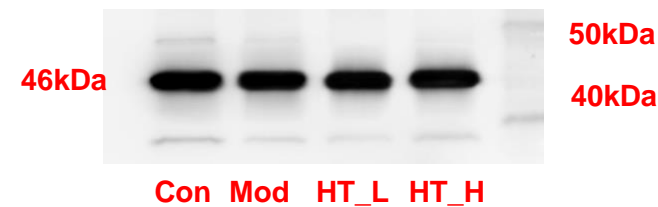

HDAC2

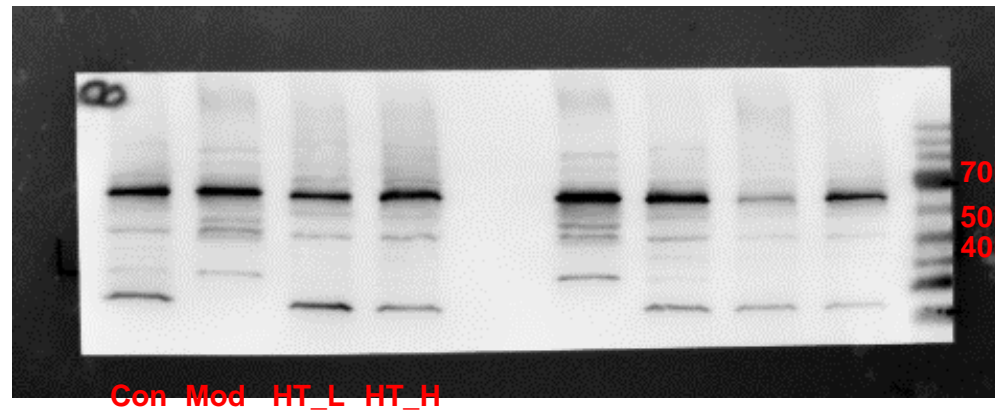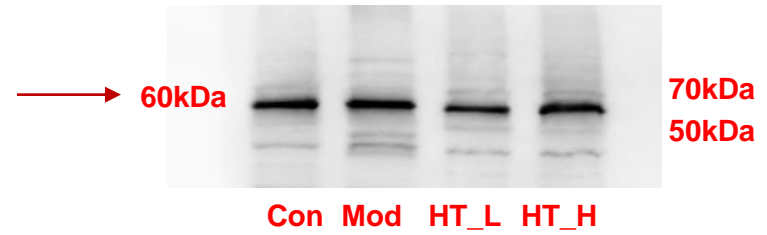

$\beta$ -actin

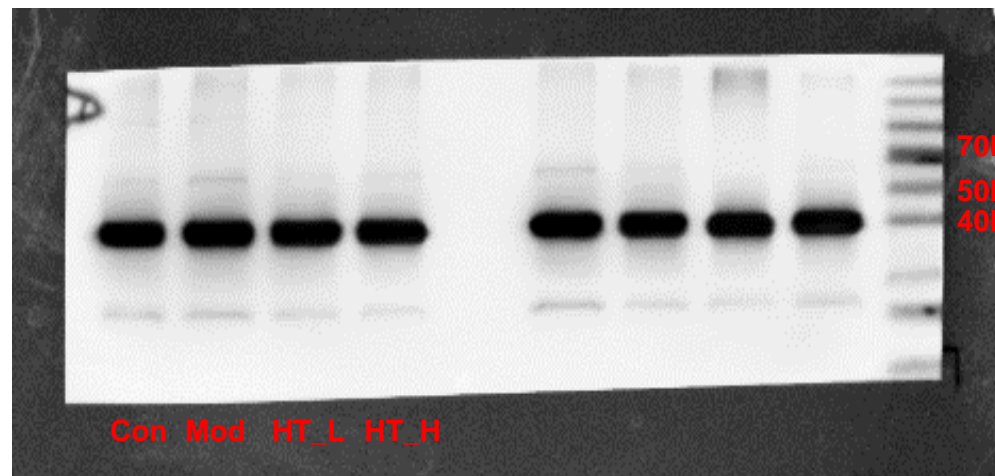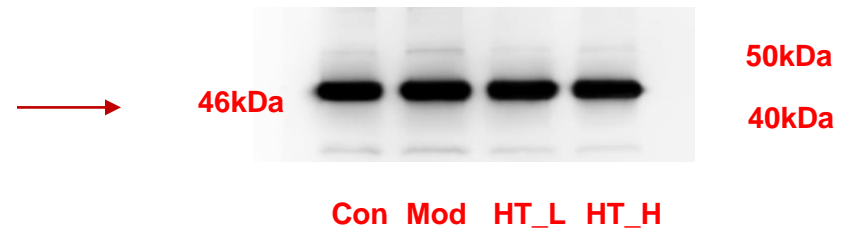

LC3

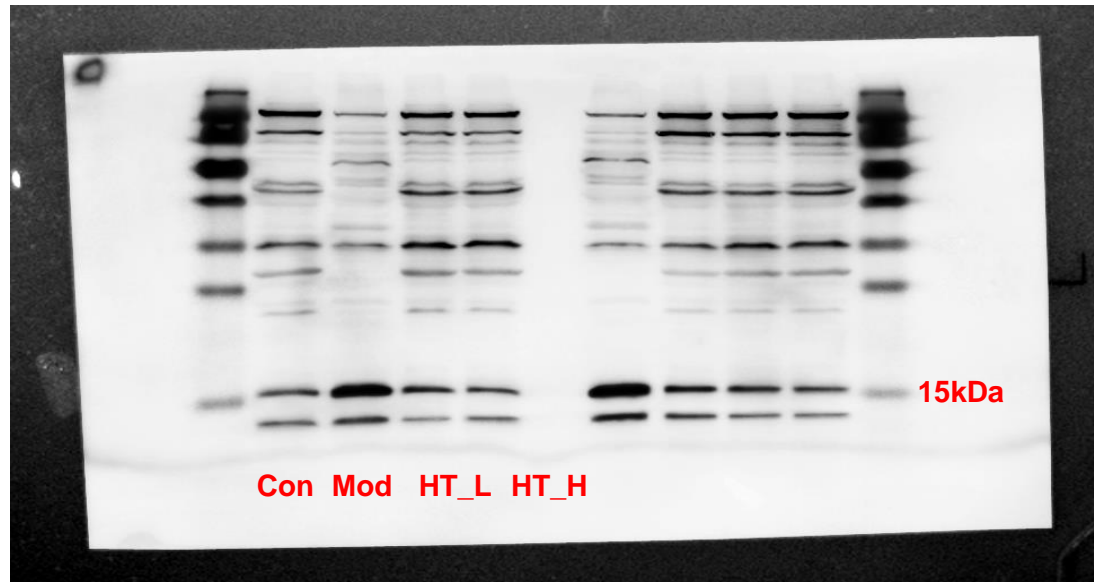

14kDa  
10kDa

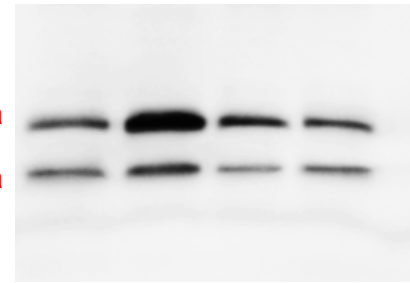

15kDa

Con Mod HT\_L HT\_H

$\beta$ -actin

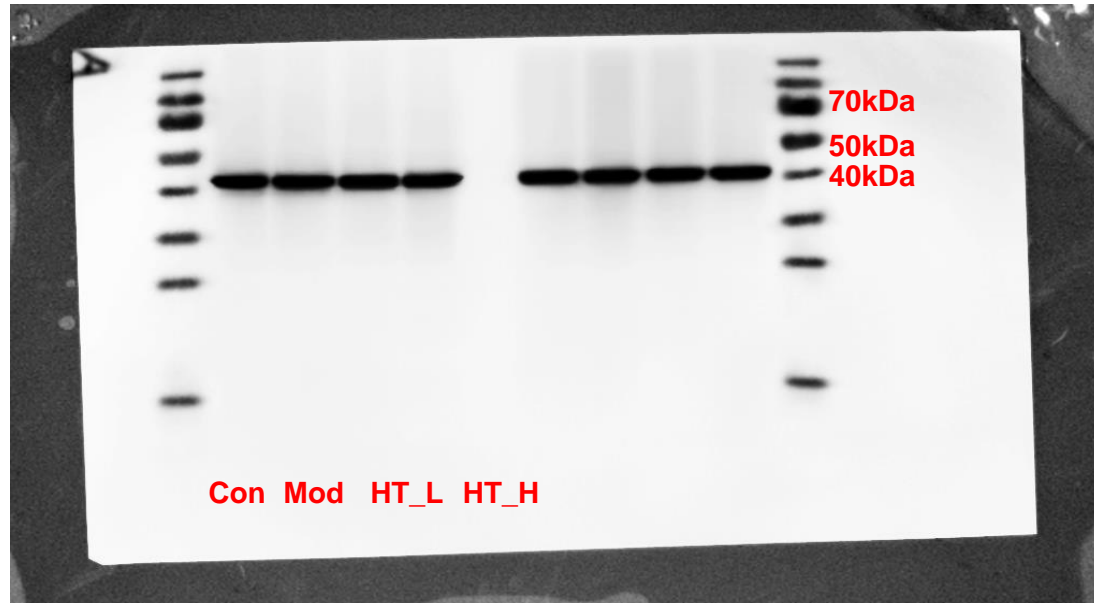

46kDa

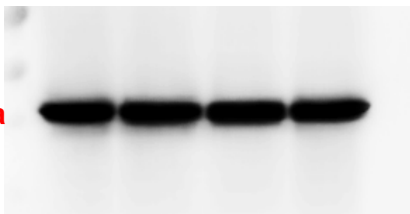

50kDa  
40kDa

Con Mod HT\_L HT\_H

P62

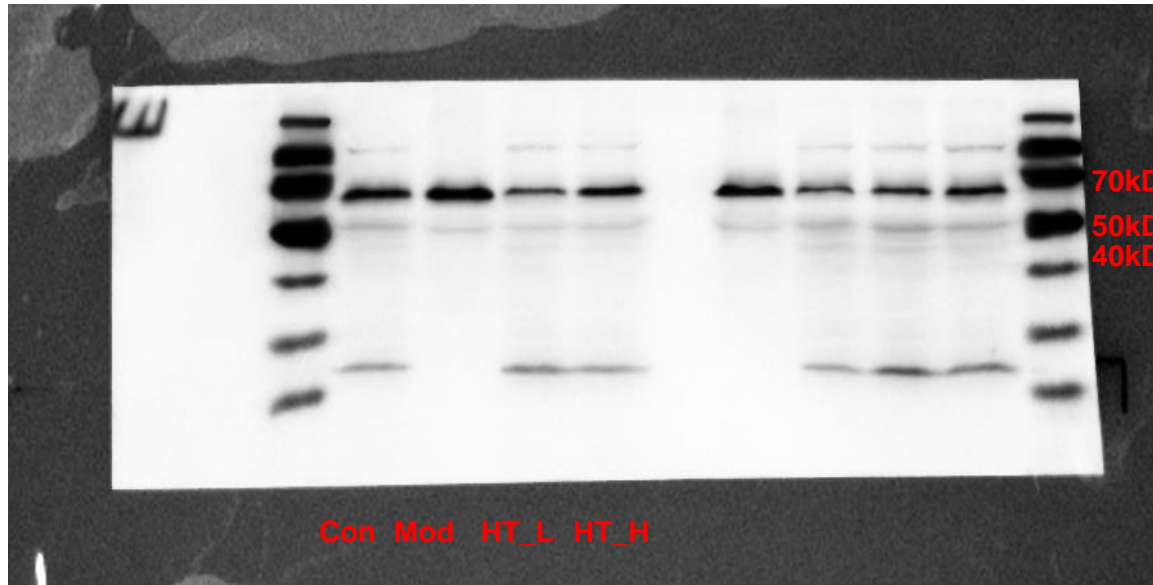

→ 62kDa

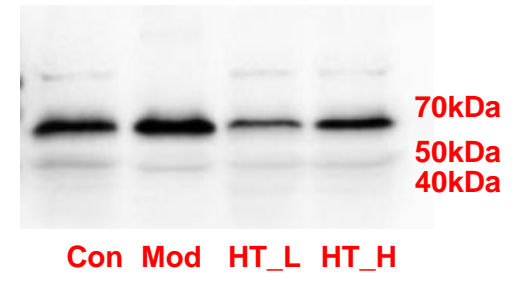

$\beta$ -actin

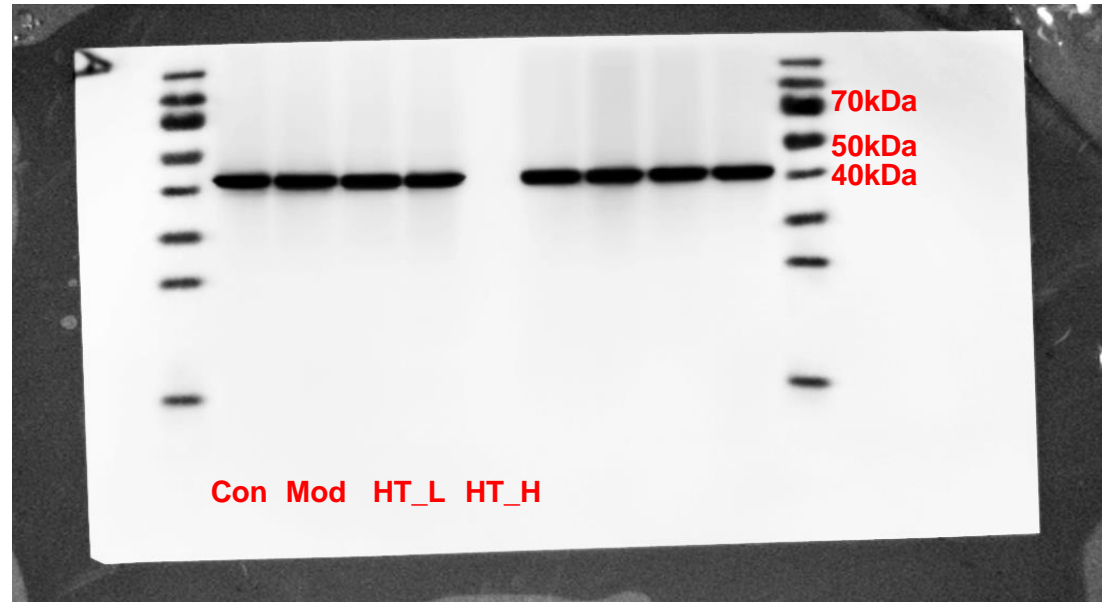

→ 46kDa

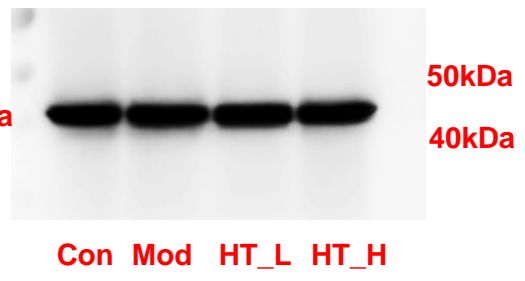

LC3

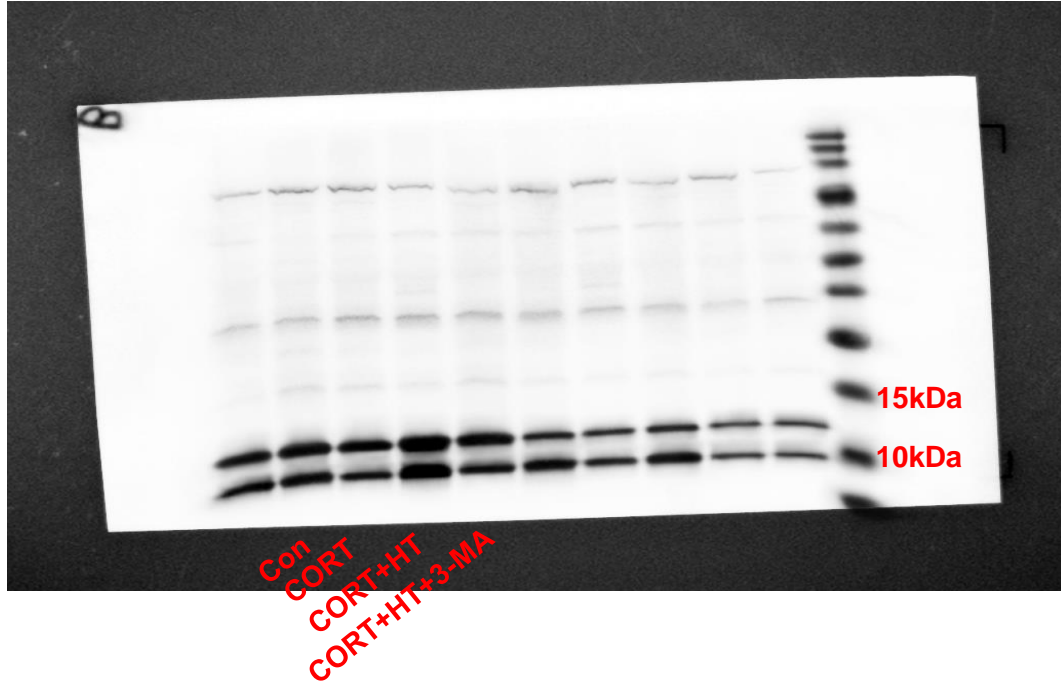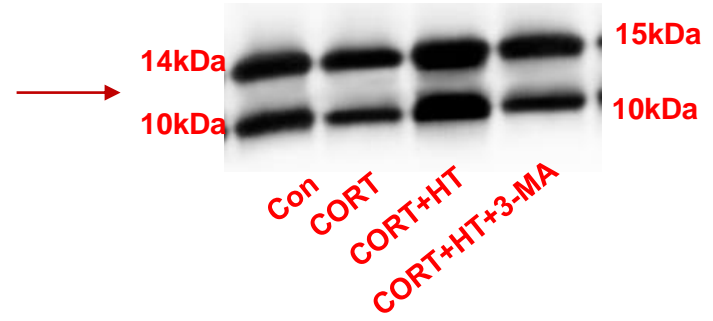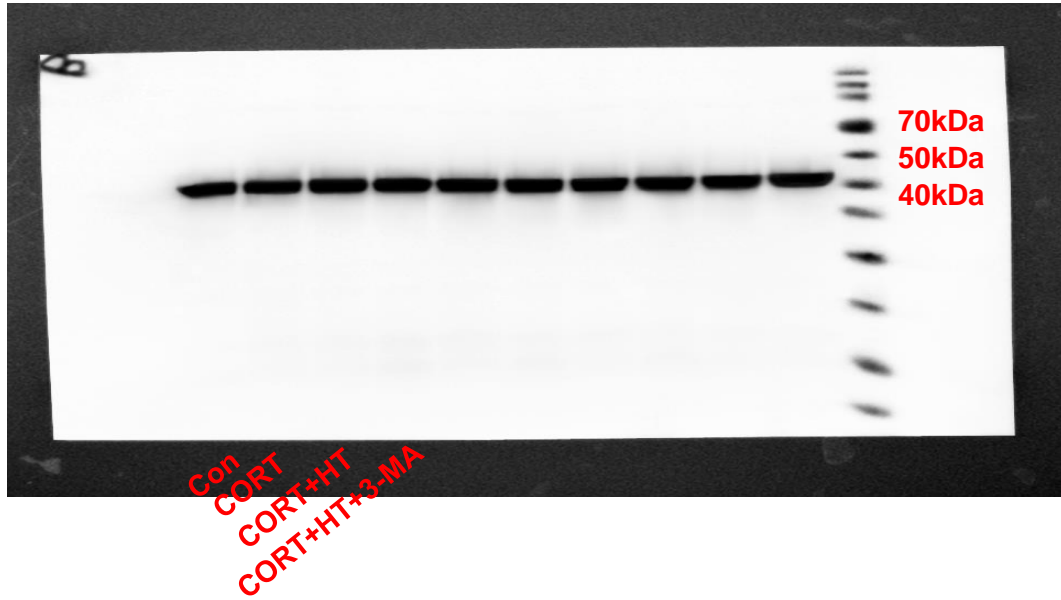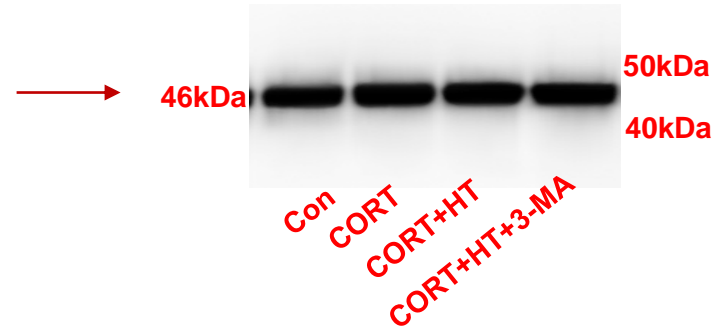

P62

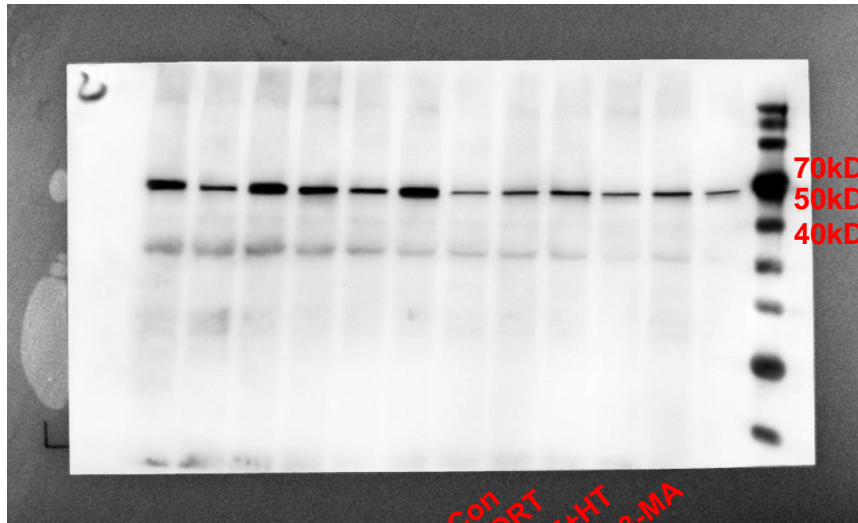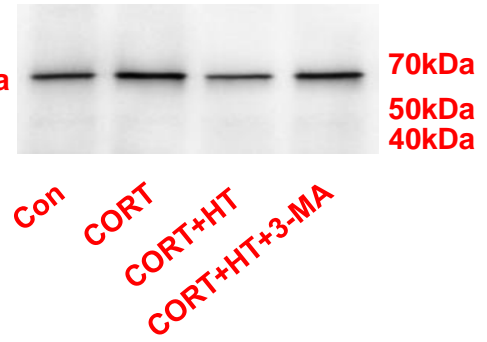

$\beta$ -actin

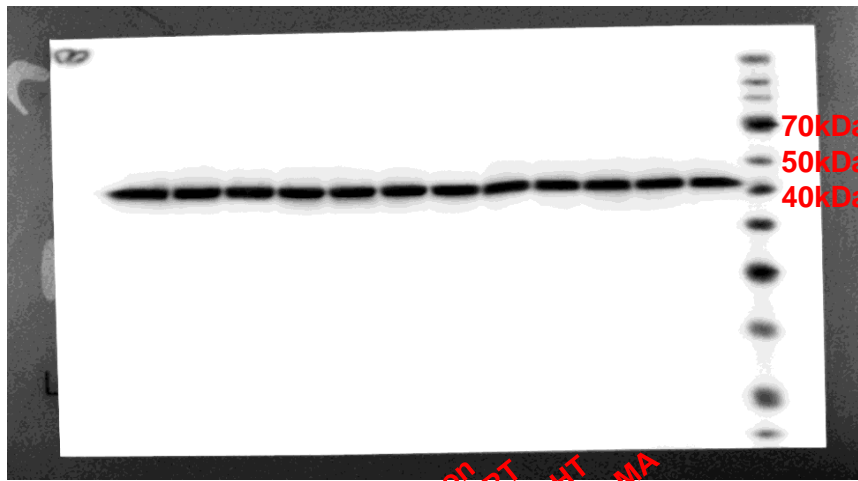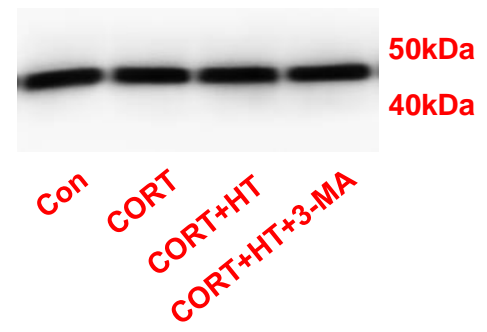

HDAC1

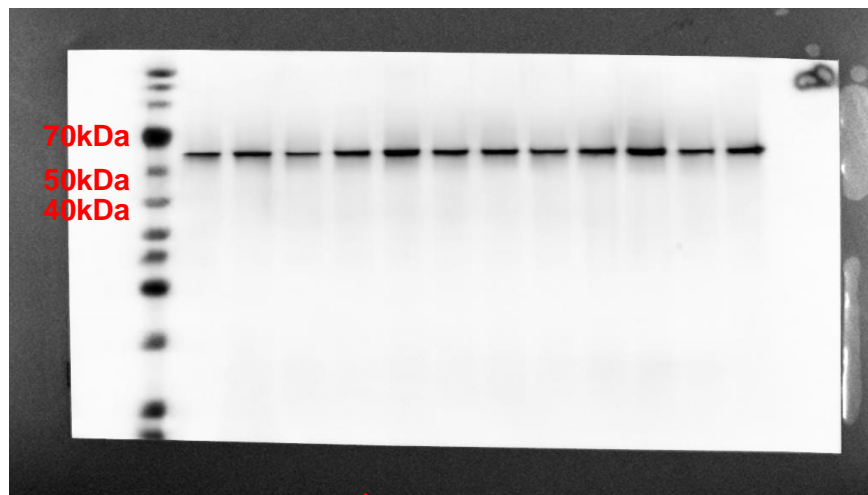

Con  
CORT  
CORT+HT  
CORT+HT+ITSa-1

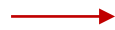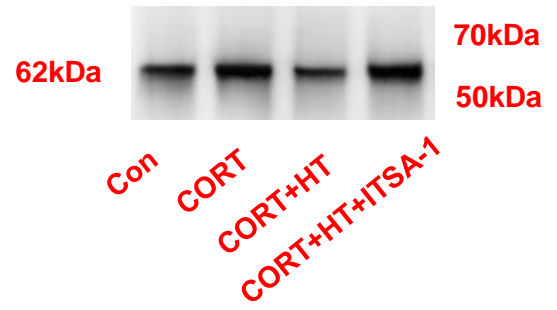

$\beta$ -actin

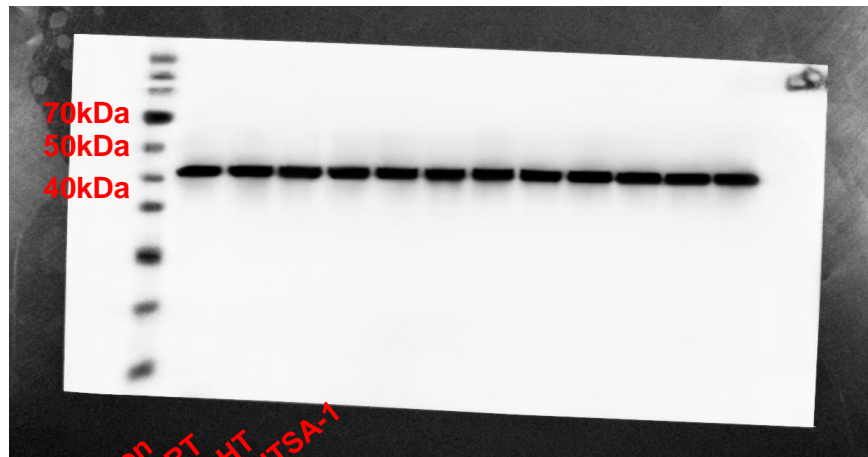

Con  
CORT  
CORT+HT  
CORT+HT+ITSa-1

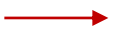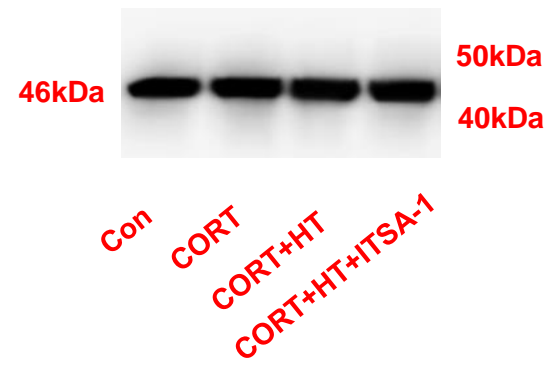

P62

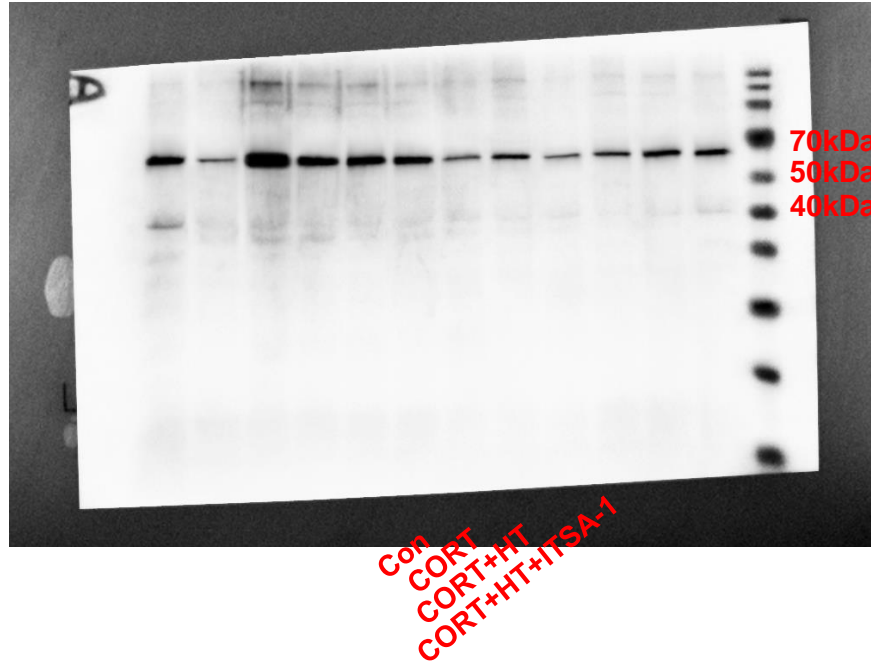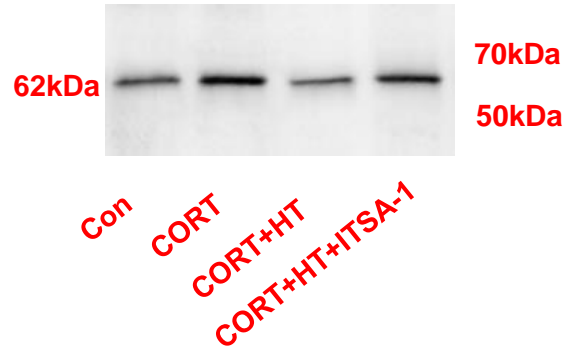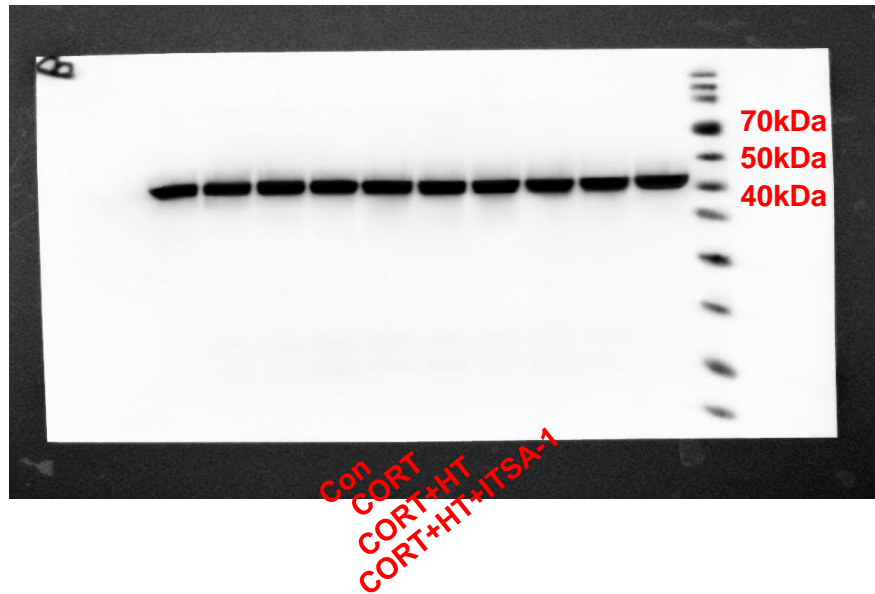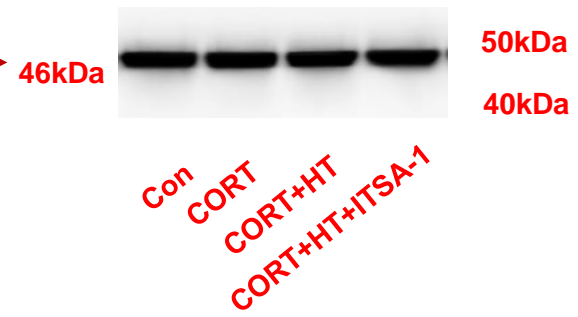

Supplement: d4fo01027b2.pdf [file d4fo01027b2.pdf]
