# Supplementary material for: Hydroxytyrosol ameliorates stress-induced liver injury through activating autophagy via HDAC1/2 inhibition
Source: Royal Society of Chemistry journal article supplement (doi:10.1039/d4fo01027b), 2024-01-01
Supplement: d4fo01027b1.pdf [file d4fo01027b1.pdf]

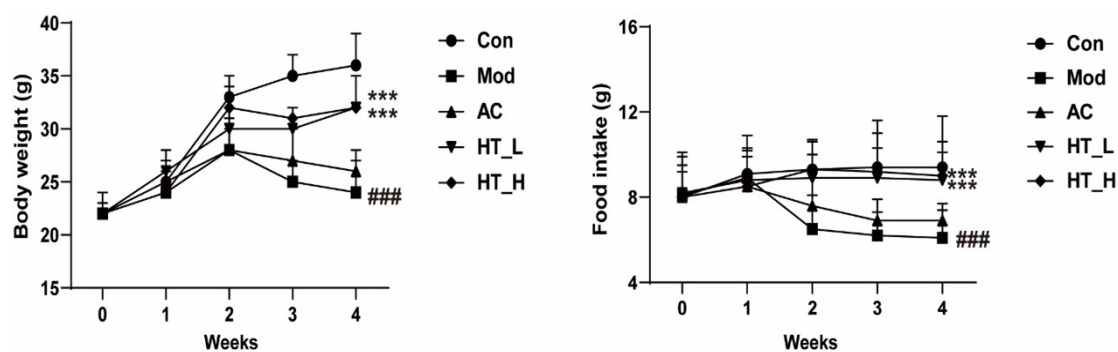

**Fig. S1** Body weight and food intake were recorded once a week during the modeling period. Data were expressed as means  $\pm$  SEM (n =8), ### $P$  < 0.001 versus control group; \*\*\* $P$  < 0.001 versus model group.

Con, control; Mod, stress-induced liver injury; AC, acetylcysteine; HT\_L, low-dose hydroxytyrosol; HT\_H, high-dose hydroxytyrosol.

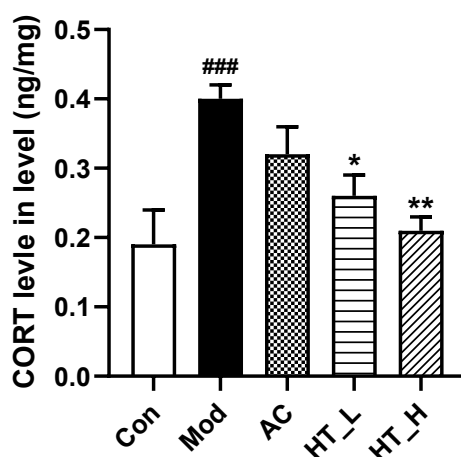

**Fig. S2** The effect of HT on liver CORT concentration. Data were expressed as means  $\pm$  SEM (n =8), ### $P$  < 0.001 versus control group; \*\* $P$  < 0.01, \* $P$  < 0.05 versus model group.

Con, control; Mod, stress-induced liver injury; AC, acetylcysteine; HT\_L, low-dose hydroxytyrosol; HT\_H, high-dose hydroxytyrosol.

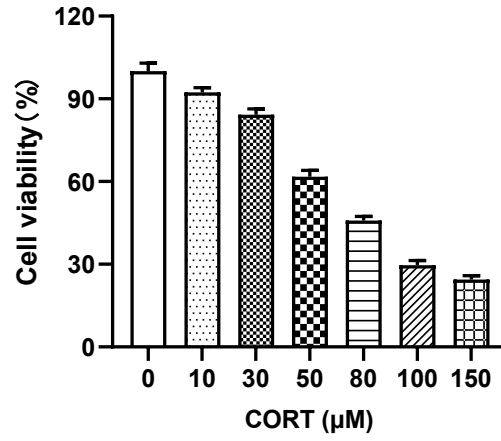

**Fig. S3** Cell viability of AML-12 cells with different concentrations of CORT  
CORT, corticosterone

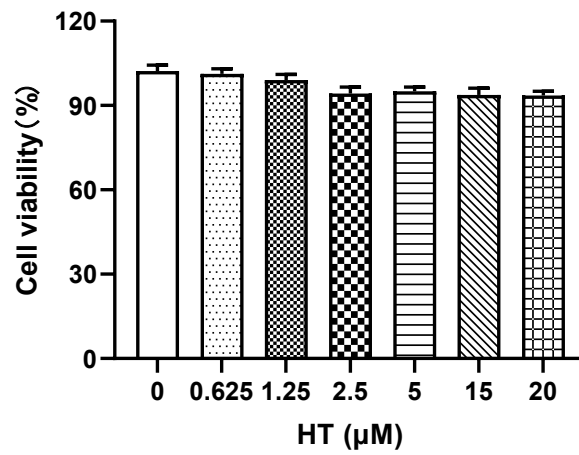

**Fig. S4** Cell viability of AML-12 cells with different concentrations of HT  
HT, hydroxytyrosol

**Table S1.** Chronic unpredictable stress regime

| Day       | Week                                                                     |                                                                          |                                     |                               |
|-----------|--------------------------------------------------------------------------|--------------------------------------------------------------------------|-------------------------------------|-------------------------------|
|           | Week 1                                                                   | Week 2                                                                   | Week 3                              | Week 4                        |
| Sunday    | White noise: 1 h (100 DB)<br>Overnight stroboscope: 12 h (120 times/min) | Cage tilt: 24 h                                                          | Cage tilt: 24 h                     | Cage tilt: 24 h               |
| Monday    | Shock: 30 min (150 times/min)                                            | Shock: 30 min (150 times/min)                                            | Shock: 30 min (150 times/min)       | Cold forced swimming: 5 min   |
| Tuesday   | Restraint: 1 h<br>Overnight illumination: 12 h                           | White noise: 2 h (100 DB)<br>Overnight stroboscope: 12 h (120 times/min) | Water deprivation: 24 h             | Shock: 30 min (150 times/min) |
| Wednesday | Cold forced swimming: 5 min                                              | Restraint: 2 h<br>Overnight illumination: 12 h                           | Tail pinch: 2 min                   | Soiled cage: 24 h             |
| Thursday  | Soiled cage: 24 h                                                        | Soiled cage: 24 h                                                        | Soiled cage: 24 h<br>Restraint: 2 h | Tail pinch: 2 min             |
| Friday    | Tail pinch: 2 min                                                        | Cold forced swimming: 5 min                                              | Overnight illumination: 12 h        | Food deprivation: 24 h        |
| Saturday  | Water deprivation: 24 h                                                  | Food deprivation: 24 h                                                   | Food deprivation: 24 h              | Soiled cage: 24 h             |
